# Supplementary material
Source: publisher site journal article supplement (https://www.dovepress.com/article/289834)
Supplement: Supplementary file 1 [file get_supplementary_file.php]

***Supporting Information***

| **a** | 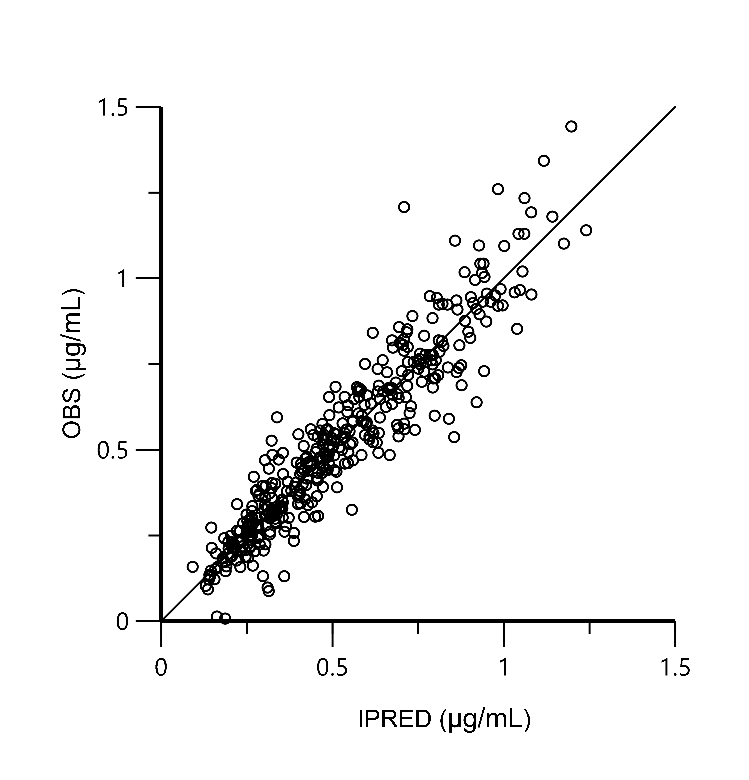 |
| --- | --- |
| **b** | 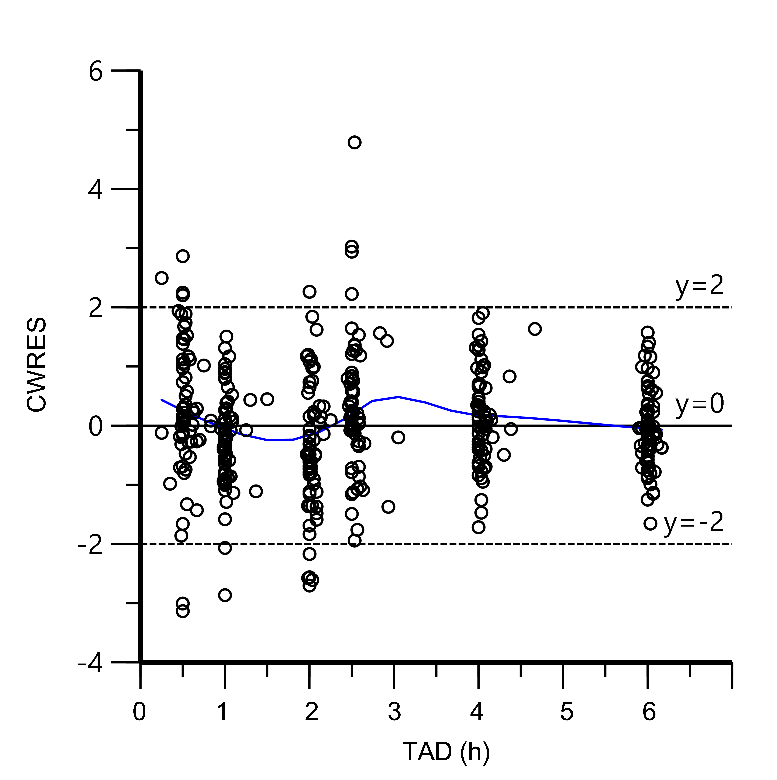 |

**Supporting Information Figure 1** Goodness-of-fit of the final model. (a) OBS *vs.* IPRED of final model; (b) CWRES *vs.* TAD of final model. The black solid lines are the reference lines, and blue solid lines are the loess smooth lines. CWRES, conditional weighted residuals; OBS, observed concentrations; IPRED, individual predicted concentrations; TAD, time after dosing.


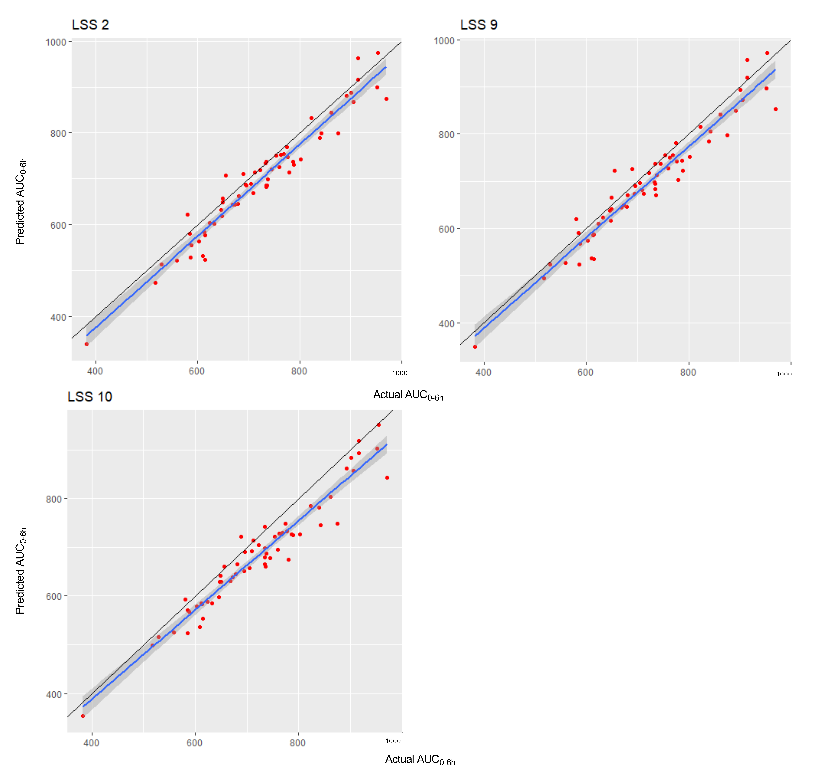

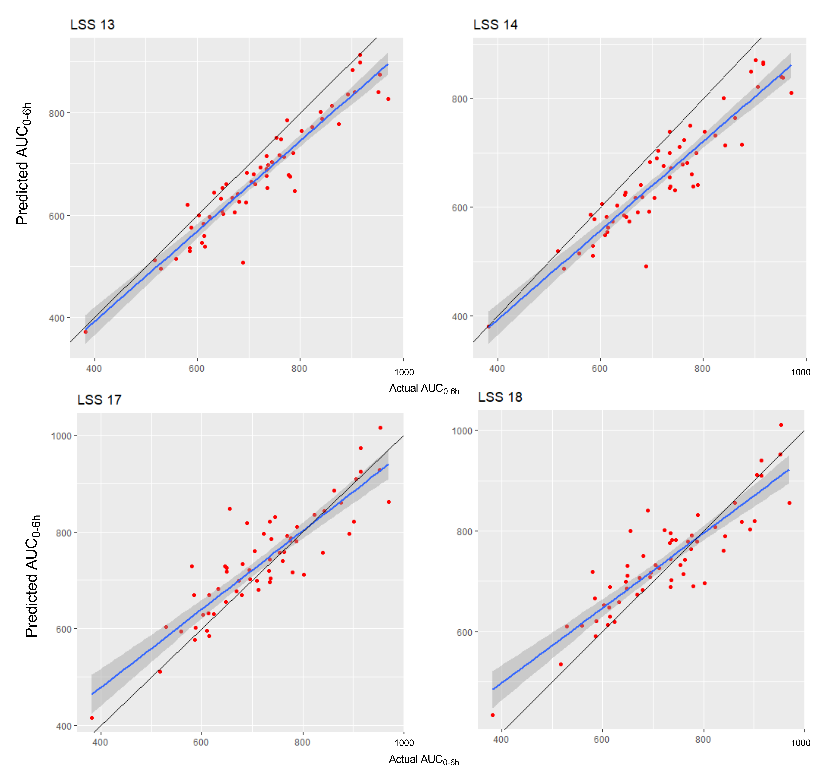


**Supporting Information Figure 2** Correlation between the actual and predicted BU AUC0-6h of LSS 2 (C2h, C2.5h, C4h and C6h), LSS 9 (C2h, C2.5h and C4h), LSS 10 (C2h, C2.5h and C6h), LSS 13 (C2h and C4h), LSS 14 (C2h and C6h), LSS 17 (C2.5h and C4h) and LSS 18 (C2.5h and C6h). Black line is the identity line and blue line is the regression line; shaded areas represent 95% confidence interval of regression line. AUC0-6h, area under the concentration-time curve of 0-6 h; LSS, Limited Sampling Strategy.


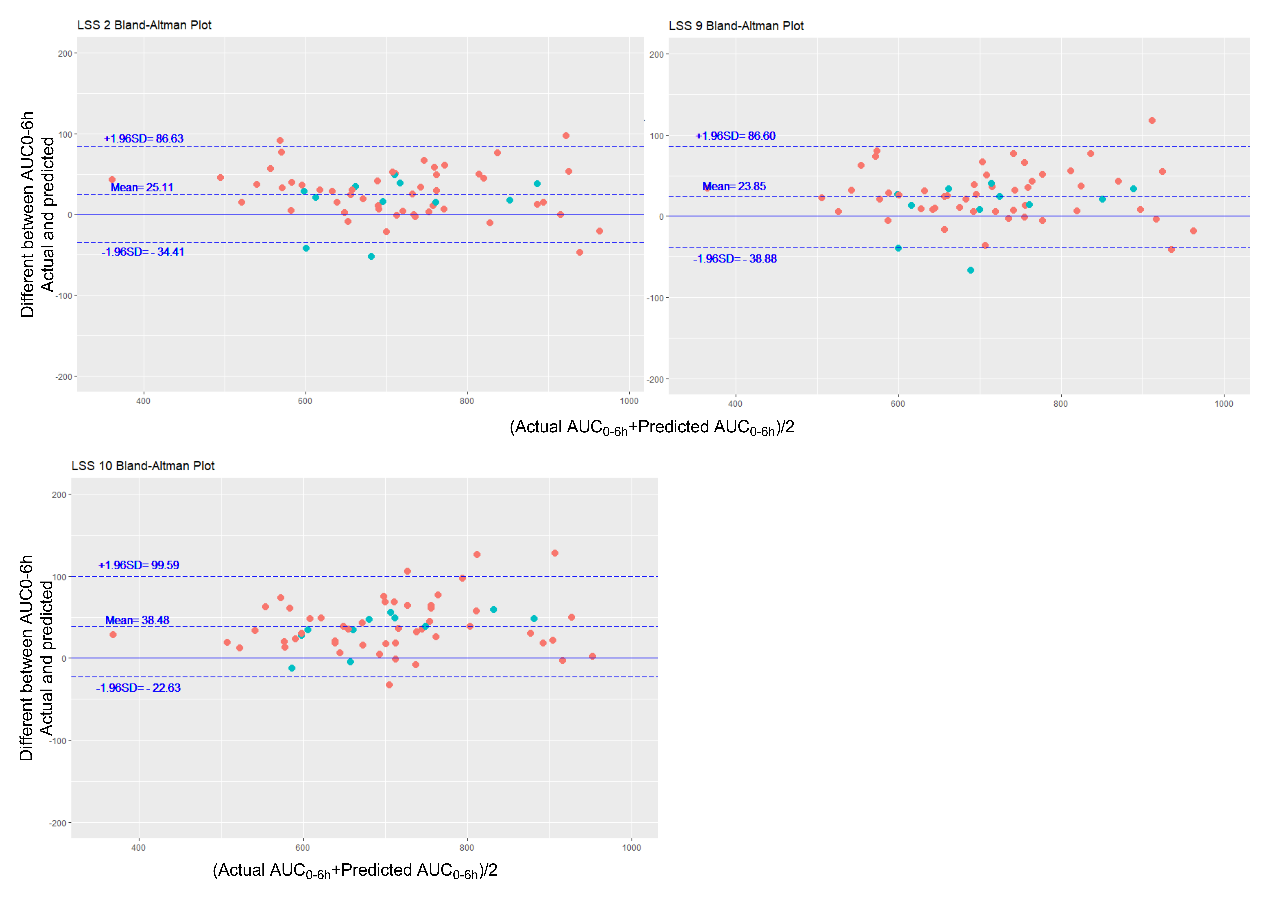

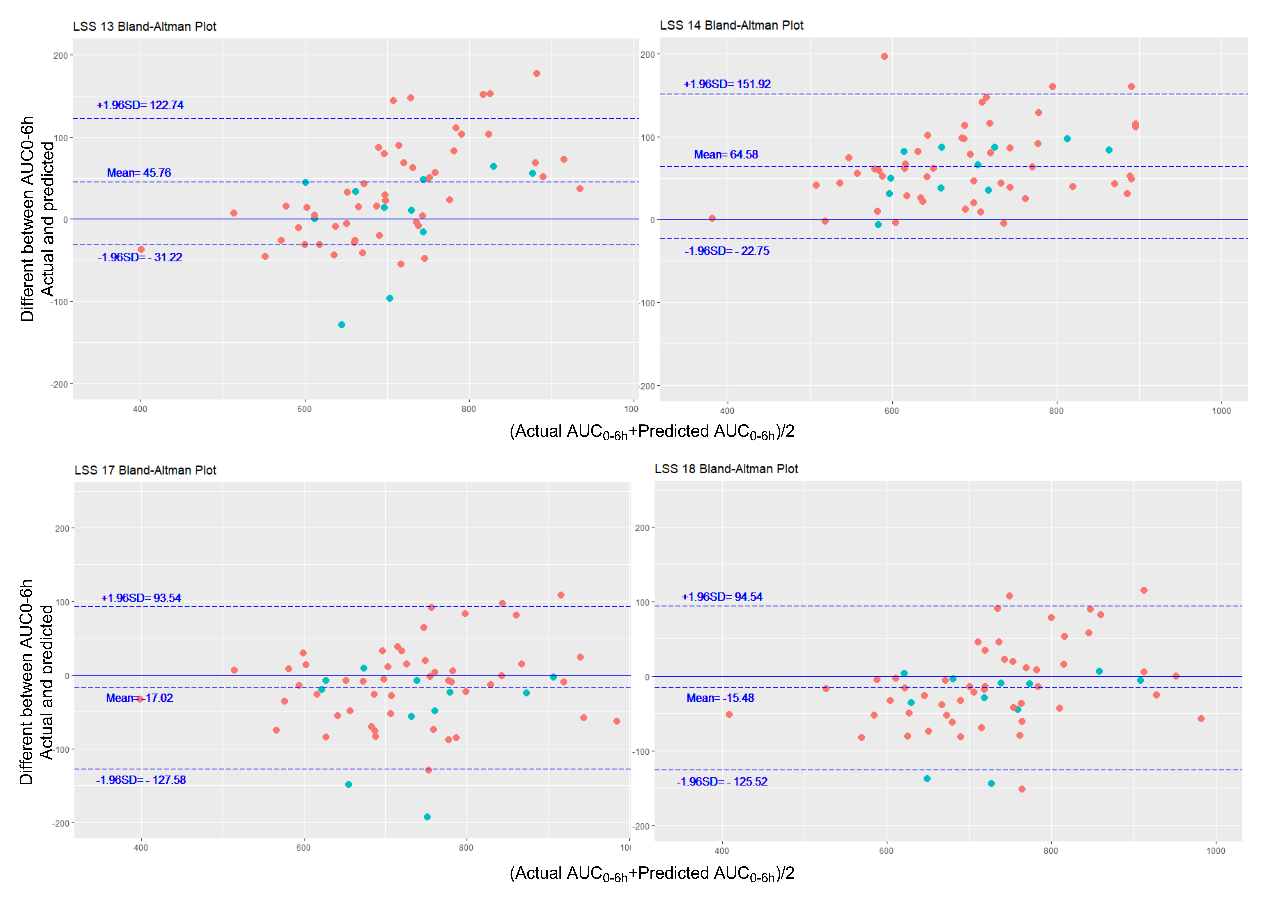


**Supporting Information Figure 3** Bland-Altman plot of the agreement between actual and predicted AUC0-6h in LSS 2 (C2h, C2.5h, C4h and C6h), LSS 9 (C2h, C2.5h and C4h), LSS 10 (C2h, C2.5h and C6h), LSS 13 (C2h and C4h), LSS 14 (C2h and C6h), LSS 17 (C2.5h and C4h) and LSS 18 (C2.5h and C6h). Red and green dots respectively represent the AUC0-6h of *GSTA1 *A/*A* and *GSTA1 *A/*B*. Dashed lines represent mean and mean ± 1.96 SD of difference between actual and predicted AUC0-6h. AUC0-6h, area under the concentration-time curve of 0-6 h; LSS, Limited Sampling Strategy.

| **a** | 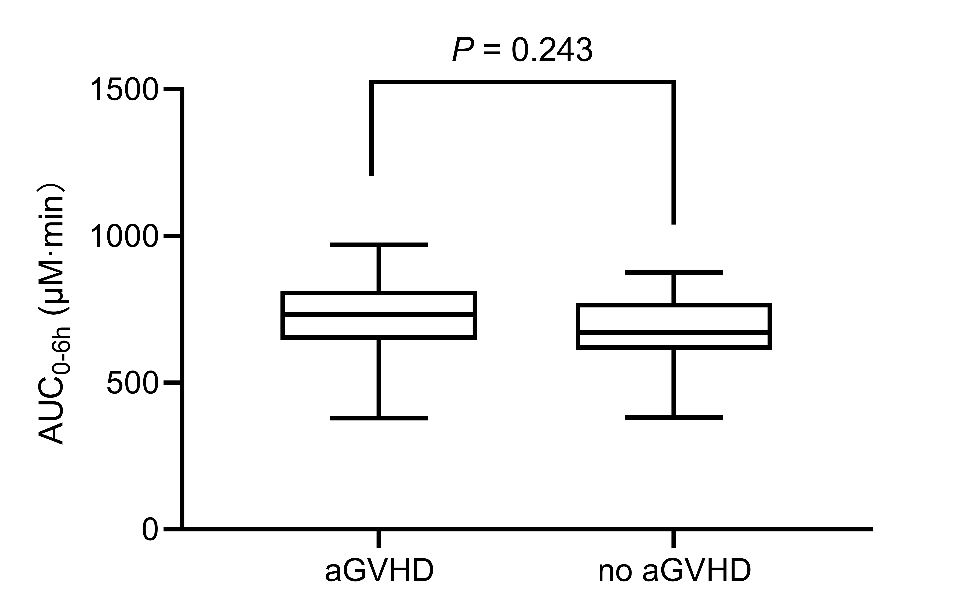 |
| --- | --- |
| **b** | 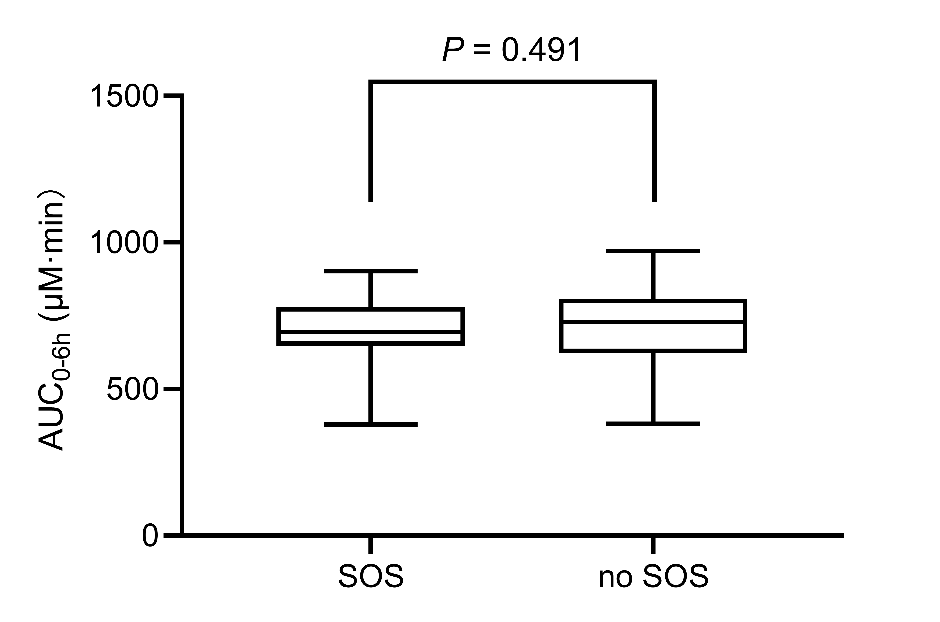 |
| **c** | 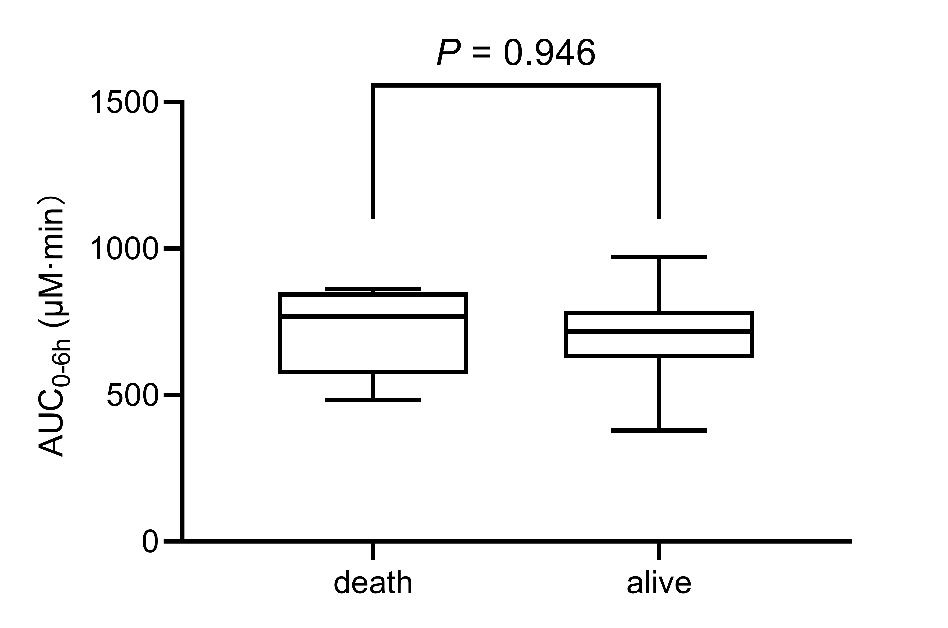 |

**Supporting Information Figure 4** Pharmacokinetic parameters and toxicity of Bu in HSCT patients. AUC0-6h of Bu against (a). occurrence of aGVHD; (b). occurrence of SOS; (c). occurrence of death. *P* values are shown on the boxes. aGVHD, acute graft-versus-host disease; AUC0-6h, area under the concentration-time curve of 0-6 h; SOS, sinusoidal obstructive syndrome.

**Supporting Information Table 1** Dosages and duration of different conditioning regimens

| **Conditioning regimen** | **Drug** | **Dosage** | **Dosing interval** | **Dosing start time** | **Duration of administration** |
| --- | --- | --- | --- | --- | --- |
| **Bu + CTX** | | | | | |
|  | Bu | 0.8~1.2 mg/kg | Q6h | -9d | 4d |
|  | CTX | 50 mg/kg | Q24h | -5d | 4d |
| **Bu + CTX + FLU** | | | | | |
|  | Bu | 0.8~1.2 mg/kg | Q6h | -7d | 3d |
|  | CTX | 50 mg/kg | Q24h | -5d | 4d |
|  | FLU | 25~30 mg/m2 | Q24h | -11d | 5d |
| **Bu + CTX + FLU + VP16** | | | | | |
|  | Bu | 0.8~1.2 mg/kg | Q6h | -8d | 3d |
|  | CTX | 50 mg/kg | Q24h | -5d | 4d |
|  | FLU | 25~30 mg/m2 | Q24h | -11d | 5d |
|  | VP16 | 300 mg/m2 |  | -12~-13d | 2~3d |
| **Bu + CTX + Ara-C** | | | | | |
|  | Bu | 0.8~1.2 mg/kg | Q6h | -8d | 3d |
|  | CTX | 50 mg/kg | Q24h | -5d | 4d |
|  | Ara-C | 4 g/m2 | Q24h | -10d | 2d |
| **Bu + CTX + Ara-C + Me-CCNU** | | | | | |
|  | Bu | 0.8~1.2 mg/kg | Q6h | -8d | 3d |
|  | CTX | 1.8 g/m2 | Q24h | -5d | 2d |
|  | Ara-C | 4 g/m2 | Q24h | -10d | 2d |
|  | Me-CCNU | 250 mg/m2 | Q24h | -3d | 1d |
| ***Bu + CTX + FLU + Dac*** | | | | | |
|  | Bu | 100 mg/m2 | Q24h | -8d | 4d |
|  | CTX | 25 mg/kg | Q24h | -10d | 2d |
|  | FLU | 40 mg/m2 | Q24h | -8d | 4d |
|  | Dac | 20 mg/m2 | Q24h | -14d | 5d |

**Abbreviations:** Bu, Busulfan; CTX, cyclophosphamide; FLU, fludarabine; VP16, etoposide; Ara-C, cytarabine; Me-CCNU, semustine; Dac, decitabine.

**Supporting Information Table 2** Primer sets and Tm used for the genotyping assays

| **Polymorphisms** | **Primer sequence 5'-3'** | **Tm** | **Length** |
| --- | --- | --- | --- |
| *GSTA1* (rs3957356 and rs3957357) | Forward: CCCTACATGGTATAGGTGAAAT Reverse: GTGCTAAGGACACATATTAGC | 52 | 822bp |
|
| *GSTM1* (rs3754446) | Forward: TTGGACATTGTTCTTGCGGAG Reverse: CTGTCCCTCAGAGAAGCCAGAA | 52 | 252bp |
|

**Abbreviations:** *GST*, glutathione S-transferase enzyme.

**Supporting Information Table 3** Formula used to obtain IV Bu doses according to each method.

| **Author** | **IV Busulfan Dosing Guideline (Q6h)** |
| --- | --- |
| Bartelink1 |  |
| Booth (FDA)2 | < 12 kg: 1.1 mg/kg/dose  > 12 kg: 0.8 mg/kg/dose |
| Paci3 | < 9 kg: Dose (mg) = AUCtarget × 0.0041 × 2.18 (L/h) × (BW/9Kg)1.26  > 9 kg: Dose (mg) = AUCtarget × 0.0041 × 2.18 (L/h) × (BW/9Kg)0.76 |
| Long-Boyle4 | < 12 kg: Dose (mg) = AUCtarget × 0.0041× 4.32 (L/h) × (BW/22kg)0.75 × (1+ 0.032 × age)  > 12 kg: Dose (mg) = AUCtarget × 0.0041 × 4.32 (L/h) ×(BW/22kg)0.75 × (1+ 0.032 × 12) × [1+0.0138 × (age-12)] |
| Nava5 | Dose (mg) = AUCtarget × 0.0041×13.7(L/h) × (BW/70)0.75 × Fmat × FGSTA1  , where TM50=46, Hill’s coefficient=2.3, ;  FGSTA1 = 1.07 for *GSTA1*A/*B*, 1 for *GSTA1*A/*B*. |

**Abbreviations:** BW, body weight; AUCtarget, targeted area under the curve of 0-6 h (µM∙min); BSA, body surface area (m2); Fmat, maturation function; PMA, postmenstrual age; TM50, PMA when Bu metabolism reaches 50% of adult levels; *GST*, glutathione S-transferase enzyme.

**Supporting Information Table 4** Detailed description of the patients' diagnoses (n=69)

| **Primary diseases** | **N** |
| --- | --- |
| **Malignant diseases** | |
| Acute lymphocytic leukemia (ALL) | 5 |
| Acute nonlymphocytic leukemia (ANLL) | 13 |
| Juvenile myelomonocytic leukemia (JMML) | 1 |
| Mixed lineage acute leukemia (MAL) | 2 |
| Myelodysplastic syndromes (MDS) | 1 |
| Non-Hodgkin lymphoma (NHL) | 3 |
| **Non-malignant diseases** | |
| Hemophagocytic syndrome | 23 |
| Osteopetrosis | 7 |
| Aplastic anemia (AA) | 5 |
| Congenital megakaryocyte thrombocytopenia (CAMT) | 2 |
| Immunodeficiencies | 5 |
| Metabolic disease | 2 |

**Supporting Information Table 5** Clinical outcomes observed in the study subjects (n=69)

| **Clinical outcomes** | **Cumulative incidence [N (%)]** | | | **Day of onset [Median (range)]** | |
| --- | --- | --- | --- | --- | --- |
| **Patients with *GSTA1 *A/*A*** | **Patients with *GSTA1 *A/*B*** | ***P* value** | **Patients with *GSTA1 *A/*A*** | **Patients with *GSTA1 *A/*B*** |
| Neutrophil recovery (+30d) | 54 (98.18) | 13 (92.86) | 0.0426* | 12 (10~18) | 13.5 (11~19) |
| Platelet recovery (+30d) | 47 (85.45) | 12 (85.71) | 0.862 | 14 (7~30) | 18 (11~23) |
| SOS | 6 (10.91) | 1 (7.14) | 0.6531 | 8.5 (1~11) | 14 |
| aGVHD (grade I–IV) | 45 (81.82) | 12 (85.71) | 0.6148 | 13 (2~39) | 19 (1~37) |
| Death | 2 (3.63) | 3 (21.43) | 0.0166* | 67.5 (21~114) | 63 (31~74) |

**Note:** **P*<0.05

**Abbreviations:** SOS, sinusoidal obstructive syndrome; aGVHD, acute graft-versus-host disease; *GST*, glutathione S-transferase enzyme.

**Supporting Information Table 6** Pharmacodynamics and toxicity data about Busulfan pharmacokinetics in pediatric patients undergoing HSCT

| **Researches** | **Year** | **Administration** | **Population** | **Diagnosis** | **Conditioning** | **Bu AUC (μM·min)** | **Bu Css (ng/mL)** | **Conclusions** |
| --- | --- | --- | --- | --- | --- | --- | --- | --- |
| Louise *et al*. 6 | 1989 | Oral | Canadians; adult; n=30 | NA | Bu/CY | AUCdose 1 606~5144 | NA | The occurrence of SOS was highly correlated with an increased AUC (> 1 SD above the mean). |
| Slattery *et al. 7* | 1997 | Oral | Canadians; children; n=45 | CML | Bu/CY | NA | 642~1749 | Css BU was the only statistically significant determinant of relapse. There was no statistically significant association of Css BU with survival or non-relapse mortality. Low BU plasma levels are associated with an increased risk of relapse. |
| Bolinger *et al.* 8 | 2000 | Oral | Canadians; children; n=31 | Leukemia or genetic diseases | Bu/CY | NA | 157~2061 | There were no graft failures in patients with a Bu Css ＞ 600 ng/ml. A correlation between Bu Css levels and regimen-related toxicity was not identified for grade 2 or higher toxicities, only 1/31 had a Bu Css ＞900 ng/ml. |
| Bolinger *et al.* 9 | 2001 | Intravenous | Caucasians; children; n=32 | Leukemia or genetic diseases | Bu/CY | NA | 527~1130 | Targeting Bu Css ranges of 600-900 ng/ml significantly improved the rate of successful engraftment. |
| McCune *et al.* 10 | 2002 | Intravenous | Mix; children; n=53 | Mix | Bu/CY | NA | 120~856 | Busulfan Css was the only statistically significant predictor of rejection, with the  risk of rejection decreasing with an increase in Busulfan Css. |
| Andersson *et al.* 11 | 2002 | Intravenous | Caucasians; adult; n=37 | CML | Bu/CY | AUCdose 5/9 816~1905 | NA | The probabilities of developing gastrointestinal toxicity, hepatotoxicity, mucositis, and aGVHD all increased with increasing AUC. Further, the risk of death was significantly lower for patients having an AUC between approximately 950 and 1520 μM·min. |
| Srivastava *et al.* 12 | 2004 | Intravenous | Asian; children; n=114 | β-thalassemia major | Bu/CY | NA | 360~923 | The clearance of Busulfan was higher and first-dose steady-state concentration was lower among those with SOS |
| Kim *et al.* 13 | 2007 | Intravenous | Korean; adult; n=61 | Mix | Bu/CY | NA | NA | *GSTA1*A/*A* is an independent protective factor against acute graft-vs.-host disease, especially for skin graft-vs.-host disease, and probably for hepatic graft-vs.-host disease, in patients using Busulfan/cyclophosphamide conditioning. |
| Elhasid *et al.* 14 | 2010 | Oral | Israeli; children; n=18 | Congenital hemoglobinopathies | Bu/CY | AUCdose 2 511~1423 | NA | There was an association between GSTM-null and the incidence of GVHD. |
| McPherson *et al.* 15 | 2011 | Intravenous and oral | Canadians; children; n=27 | Sickle cell disease | Bu/CY | AUCdose 1 780~1305 | NA | SOS was not associated with Busulfan AUC. |
| Lee *et al.* 16 | 2012 | Intravenous | Korean; children; n=24 | Mix | Bu/Flu | AUCday 1 2942~7712 | NA | Grade III/IV hepatic toxicities were more common in patients whose total AUC was over 18,757 mmol*min/L. |
| Russell *et al.* 17 | 2013 | Intravenous | Canadians; adult; n=158 | Mix | Bu/Flu | AUCdaily 2184~5995 | NA | Patients with Bu exposures below the median AUC of 4439 μM/min were at increased risk for aGVHD grade II-IV. Those in the highest and lowest Bu exposure quartiles (daily AUC < 814 μM/min and > 993 μM/min) had an increased risk of non-relapse mortality, as well as worse disease-free survival and overall survival. Bu exposures between 4440 and 4993 μM/min were accompanied by the lowest risk of both non-elapse mortality and aGVHD. |
| Ansari *et al.* 18 | 2014 | Intravenous | Mix; children; n=75 | Mix | Mix | NA | 325~1227 | First-dose Bu Css .600 ng/mL was associated with a higher non-relapse mortality and grade 2–4 aGVHD, a lower EFS, and OS. |
| Okamoto *et al.* 19 | 2014 | Intravenous | Japanese; children; n=25 | Mix | Mix | AUCdose 9/11 796~1905 | NA | Toxicities did not correlate with the BU level. |
| Tesfaye *et al.* 20 | 2014 | Intravenous | Caucasians; children; n=62 | NA | Bu/CY | AUC0-tlast 997~3122 | NA | Although AUC does not necessarily correspond with outcomes, the fact that doses were changed in 54% of cases underlines the importance of TDM. |
| Ansari *et al.* 21 | 2015 | Intravenous | Middle east; children; n=44 | Thalassemia | Mix | NA | 420~2126 | There was an association between GSTM-null and the incidence of regimen-related toxicity. |
| Boyoon *et al.* 22 | 2015 | Intravenous | Korean; adult; n=36 | Mix | Mix | NA | NA | Acute GVHD had a trend to increase more than two times in the upper AUC group (more than 1500μM·min) than in the intermediate AUC group (950-1500μM·min). Chronic GVHD and TRM also tended to increase in the upper AUC group while graft failure or rejection tended to increase in the lower AUC groups although not significant. |
| Bremer *et al.* 23 | 2015 | Oral | Caucasians; adolescent and adult; n=114 | Mix | Bu/CY | NA | 600~1780 | Mortality within 3 months was associated with higher first dose Bu exposure, and high Bu exposure may increase CY toxicity by reducing intracellular glutathione. |
| Bartelink *et al.* 24 | 2016 | Intravenous | Mix; children and young adults; n=674 | Mix | Mix | NA | NA | Graft-failure/relapse occurred more frequently in the low AUC group. Acute toxicity, cGVHD and treat related mortality was significantly higher in the high AUC group, independent of indication. |
| Ansari *et al.* 25 | 2017 | Intravenous | Mix; children; n=276 | Mix | Mix | AUC0-6h 438~1778 | 325~1238 | Slow metabolizing capacity were associated with higher incidence of sinusoidal obstruction syndrome, acute graft versus host disease and combined treatment-related toxicity |
| Jessica *et al.* 26 | 2018 | Intravenous | Caucasians; adult; n=52 | Mix | NA | AUCday 1 3672.1~6609.8 | NA | There was no significant association between AUCfirst and death, relapse, or a composite of the two. |
| Faraci *et al.* 27 | 2018 | Intravenous and oral | Caucasians; children; n=82 | Mix | Mix | AUC0-infinite 669~1308 | 458~897 | No statistically significant differences were found between acute and chronic GVHD and AUC levels. |
| Takachi *et al.* 28 | 2019 | Intravenous and oral | Japanese; infants; n=92 | acute lymphoblastic leukemia | Bu/CY | AUCtotal 11936~29159 | 211~1091 | The clinical outcome of engraftment, graft-versus-host disease, adverse events, including sinusoidal obstruction syndrome, and survival did not correlate with the BU PK data. |
| Schechter *et al.* 29 | 2020 | Intravenous | Caucasians; children; n=75 | high-risk neuroblastoma | Bu/Mel | NA | NA | Initial or cumulative Busulfan steady-state concentration were not associated with SOS. |

**Abbreviations:** aGVHD, acute graft-versus-host disease; AUC, area under the concentration-time curve; Bu, Busulfan; CY, cyclophosphamide; Css, concentration of steady state; CML, chronic myelogenous leukemia; EFS, event-free survival; FLU, fludarabine; *GST*, glutathione S-transferase enzyme; OS, overall survival; SOS, sinusoidal obstructive syndrome.

**REFERENCES**

1. Bartelink IH, Boelens JJ, Bredius RG, et al. Body weight-dependent pharmacokinetics of Busulfan in paediatric haematopoietic stem cell transplantation patients: towards individualized dosing. *Clin Pharmacokinet*. May 1 2012;51(5):331-45. doi:10.2165/11598180-000000000-00000

2. Booth BP, Rahman A, Dagher R, et al. Population pharmacokinetic-based dosing of intravenous Busulfan in pediatric patients. *Journal of clinical pharmacology*. Jan 2007;47(1):101-11. doi:10.1177/0091270006295789

3. Paci A, Vassal G, Moshous D, et al. Pharmacokinetic behavior and appraisal of intravenous Busulfan dosing in infants and older children: the results of a population pharmacokinetic study from a large pediatric cohort undergoing hematopoietic stem-cell transplantation. *Ther Drug Monit*. Apr 2012;34(2):198-208. doi:10.1097/FTD.0b013e31824c2f60

4. Long-Boyle JR, Savic R, Yan S, et al. Population pharmacokinetics of Busulfan in pediatric and young adult patients undergoing hematopoietic cell transplant: a model-based dosing algorithm for personalized therapy and implementation into routine clinical use. *Ther Drug Monit*. Apr 2015;37(2):236-45. doi:10.1097/ftd.0000000000000131

5. Nava T, Kassir N, Rezgui MA, et al. Incorporation of GSTA1 genetic variations into a population pharmacokinetic model for IV Busulfan in paediatric hematopoietic stem cell transplantation. *Br J Clin Pharmacol*. Jul 2018;84(7):1494-1504. doi:10.1111/bcp.13566

6. Grochow LB, Jones RJ, Brundrett RB, et al. Pharmacokinetics of Busulfan: correlation with veno-occlusive disease in patients undergoing bone marrow transplantation. *Cancer Chemother Pharmacol*. 1989;25(1):55-61. doi:10.1007/bf00694339

7. Slattery JT, Clift RA, Buckner CD, et al. Marrow transplantation for chronic myeloid leukemia: the influence of plasma Busulfan levels on the outcome of transplantation. *Blood*. Apr 15 1997;89(8):3055-60.

8. Bolinger AM, Zangwill AB, Slattery JT, et al. An evaluation of engraftment, toxicity and Busulfan concentration in children receiving bone marrow transplantation for leukemia or genetic disease. *Bone Marrow Transplant*. May 2000;25(9):925-30. doi:10.1038/sj.bmt.1702371

9. Bolinger AM, Zangwill AB, Slattery JT, et al. Target dose adjustment of Busulfan in pediatric patients undergoing bone marrow transplantation. *Bone Marrow Transplant*. Dec 2001;28(11):1013-8. doi:10.1038/sj.bmt.1703264

10. McCune JS, Gooley T, Gibbs JP, et al. Busulfan concentration and graft rejection in pediatric patients undergoing hematopoietic stem cell transplantation. *Bone Marrow Transplant*. Aug 2002;30(3):167-73. doi:10.1038/sj.bmt.1703612

11. Andersson BS, Thall PF, Madden T, et al. Busulfan systemic exposure relative to regimen-related toxicity and acute graft-versus-host disease: defining a therapeutic window for i.v. BuCy2 in chronic myelogenous leukemia. *Biology of blood and marrow transplantation : journal of the American Society for Blood and Marrow Transplantation*. 2002;8(9):477-85. doi:10.1053/bbmt.2002.v8.pm12374452

12. Srivastava A, Poonkuzhali B, Shaji RV, et al. Glutathione S-transferase M1 polymorphism: a risk factor for hepatic venoocclusive disease in bone marrow transplantation. *Blood*. Sep 1 2004;104(5):1574-7. doi:10.1182/blood-2003-11-3778

13. Kim I, Keam B, Lee KH, et al. Glutathione S-transferase A1 polymorphisms and acute graft-vs.-host disease in HLA-matched sibling allogeneic hematopoietic stem cell transplantation. *Clin Transplant*. Mar-Apr 2007;21(2):207-13. doi:10.1111/j.1399-0012.2006.00624.x

14. Elhasid R, Krivoy N, Rowe JM, et al. Influence of glutathione S-transferase A1, P1, M1, T1 polymorphisms on oral Busulfan pharmacokinetics in children with congenital hemoglobinopathies undergoing hematopoietic stem cell transplantation. *Pediatr Blood Cancer*. Dec 1 2010;55(6):1172-9. doi:10.1002/pbc.22739

15. McPherson ME, Hutcherson D, Olson E, Haight AE, Horan J, Chiang KY. Safety and efficacy of targeted Busulfan therapy in children undergoing myeloablative matched sibling donor BMT for sickle cell disease. *Bone Marrow Transplant*. Jan 2011;46(1):27-33. doi:10.1038/bmt.2010.60

16. Lee JW, Kang HJ, Lee SH, et al. Highly variable pharmacokinetics of once-daily intravenous Busulfan when combined with fludarabine in pediatric patients: phase I clinical study for determination of optimal once-daily Busulfan dose using pharmacokinetic modeling. *Biology of blood and marrow transplantation : journal of the American Society for Blood and Marrow Transplantation*. Jun 2012;18(6):944-50. doi:10.1016/j.bbmt.2011.11.025

17. Russell JA, Kangarloo SB, Williamson T, et al. Establishing a target exposure for once-daily intravenous Busulfan given with fludarabine and thymogloBulin before allogeneic transplantation. *Biology of blood and marrow transplantation : journal of the American Society for Blood and Marrow Transplantation*. Sep 2013;19(9):1381-6. doi:10.1016/j.bbmt.2013.07.002

18. Ansari M, Théoret Y, Rezgui MA, et al. Association between Busulfan exposure and outcome in children receiving intravenous Busulfan before hematopoietic stem cell transplantation. *Ther Drug Monit*. Feb 2014;36(1):93-9. doi:10.1097/FTD.0b013e3182a04fc7

19. Okamoto Y, Nagatoshi Y, Kosaka Y, et al. Prospective pharmacokinetic study of intravenous Busulfan in hematopoietic stem cell transplantation in 25 children. *Pediatr Transplant*. May 2014;18(3):294-301. doi:10.1111/petr.12236

20. Malis J. The importance of Therapeutic Drug Monitoring (TDM) for parenteral Busulfan dosing in conditioning regimen for Hematopoietic Stem Cell Transplantation (HSCT) in children. *Annals of Transplantation*. 2014;19:214-224. doi:10.12659/aot.889933

21. Ansari M, Huezo-Diaz P, Rezgui MA, et al. Influence of glutathione S-transferase gene polymorphisms on Busulfan pharmacokinetics and outcome of hematopoietic stem-cell transplantation in thalassemia pediatric patients. *Bone Marrow Transplant*. Mar 2016;51(3):377-83. doi:10.1038/bmt.2015.321

22. Choi B, Kim MG, Han N, et al. Population pharmacokinetics and pharmacodynamics of Busulfan with GSTA1 polymorphisms in patients undergoing allogeneic hematopoietic stem cell transplantation. *Pharmacogenomics*. 2015;16(14):1585-94. doi:10.2217/pgs.15.98

23. Bremer S, Fløisand Y, Brinch L, Gedde-Dahl T, Bergan S. Glutathione Transferase Gene Variants Influence Busulfan Pharmacokinetics and Outcome After Myeloablative Conditioning. *Ther Drug Monit*. Aug 2015;37(4):493-500. doi:10.1097/ftd.0000000000000180

24. Bartelink IH LA, Elisabeth ML, *et al*. Association of Busulfan exposure with survival and toxicity after haemopoietic cell transplantation in children and young adults: a multicentre, retrospective cohort analysis. *Lancet Haematol*. 2016;3(11):e526–e536. doi:10.1016/S2352-3026(16)30114-4

25. Ansari M, Curtis PH, Uppugunduri CRS, et al. GSTA1 diplotypes affect Busulfan clearance and toxicity in children undergoing allogeneic hematopoietic stem cell transplantation: a multicenter study. *Oncotarget*. Oct 31 2017;8(53):90852-90867. doi:10.18632/oncotarget.20310

26. Davis JM, Ivanova A, Chung Y, et al. Evaluation of a Test Dose Strategy for Pharmacokinetically-Guided Busulfan Dosing for Hematopoietic Stem Cell Transplantation. *Biology of blood and marrow transplantation : journal of the American Society for Blood and Marrow Transplantation*. Feb 2019;25(2):391-397. doi:10.1016/j.bbmt.2018.09.017

27. Faraci M, Tinelli C, Lanino E, et al. Monitoring of Busulphan Concentrations in Children Undergone Hematopoietic Stem Cell Transplantation: Unicentric Experience over 10 years. *Eur J Drug Metab Pharmacokinet*. Apr 2018;43(2):173-181. doi:10.1007/s13318-017-0431-0

28. Takachi T, Arakawa Y, Nakamura H, et al. Personalized pharmacokinetic targeting with Busulfan in allogeneic hematopoietic stem cell transplantation in infants with acute lymphoblastic leukemia. *Int J Hematol*. Sep 2019;110(3):355-363. doi:10.1007/s12185-019-02684-0

29. Schechter T, Perez-AlBuerne E, Lin TF, et al. Veno-occlusive disease after high-dose Busulfan-melphalan in neuroblastoma. *Bone Marrow Transplant*. Mar 2020;55(3):531-537. doi:10.1038/s41409-018-0298-y
